# Supplementary material for: A ureido-pyrimidone based aspartic acid derivative: synthesis and pH-responsive self-assembly in water
Source: Royal Society of Chemistry journal article supplement (doi:10.1039/c9nj03830b), 2019-01-01
Supplement: c9nj03830b1.pdf [file c9nj03830b1.pdf]

## Supporting Information

### **A ureido-pyrimidone based aspartic acid derivative: synthesis and pH-responsive self-assembly in water**

Hongkun Jiang, Lei Kan, Zhipeng Wang, Xinyue Zhang, Guojun Wang, \* Shan Gao, Ning Ma and Hao Wei\*

*College of Material Science and Chemical Engineering, Harbin Engineering University Nantong Road 145, Harbin, 150001, China*

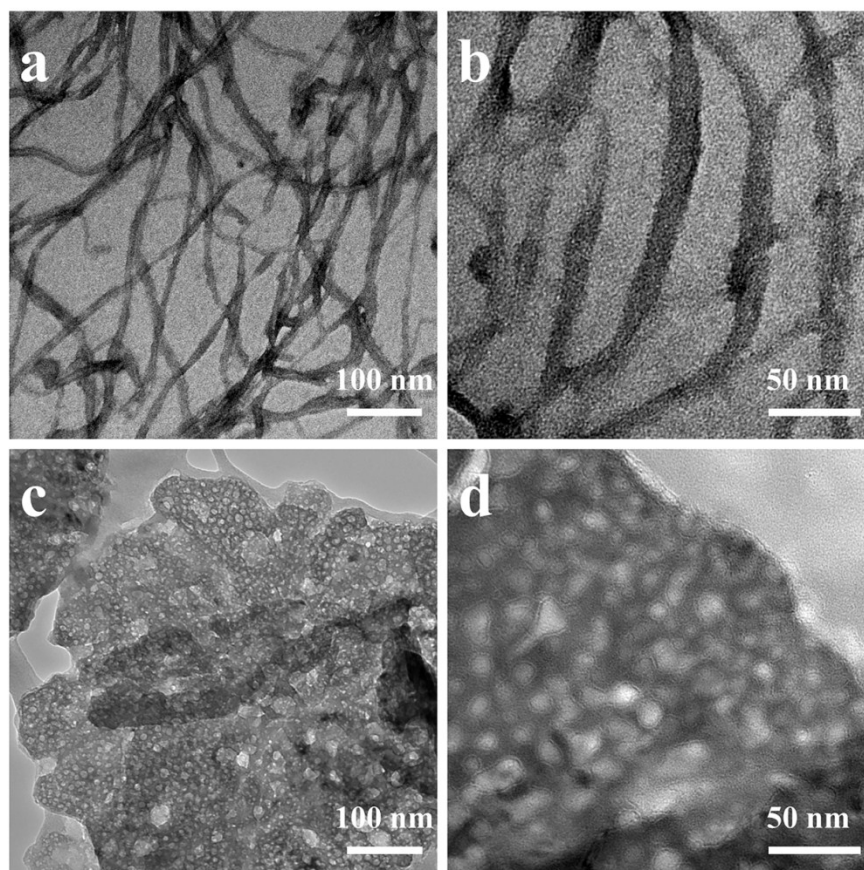

Figure.S1 TEM image of UPy-Asp at pH=7.0 (a, b) and pH=2.0 (c, d).

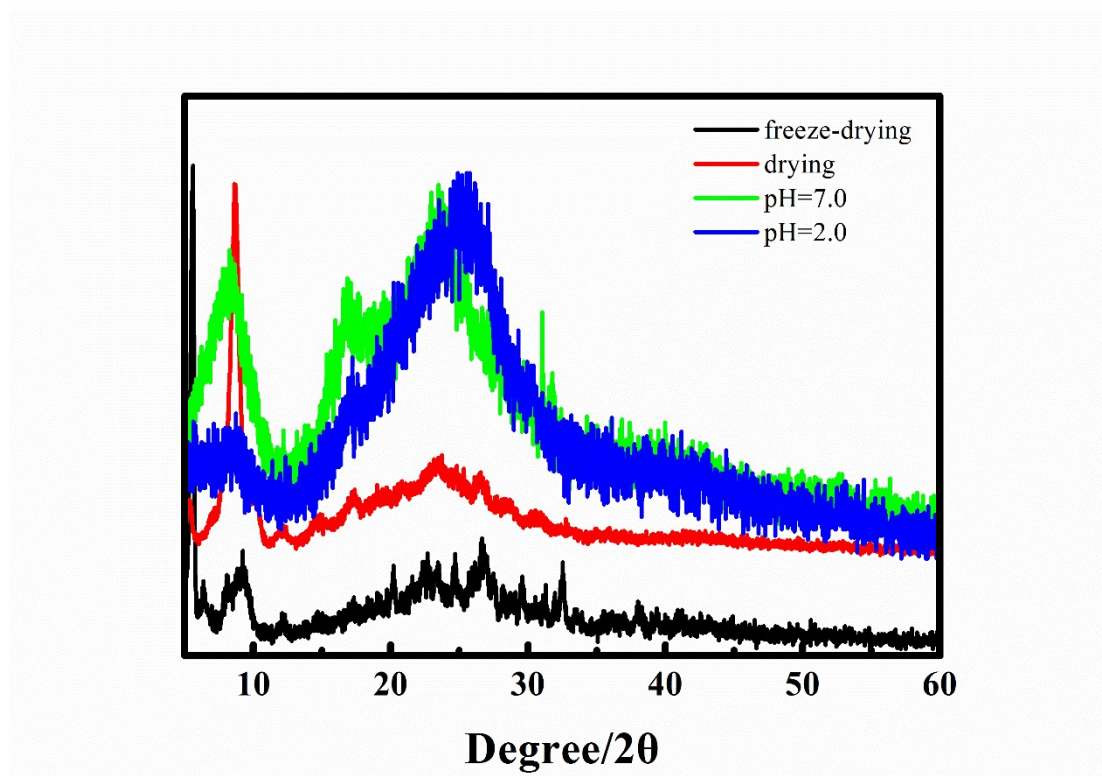

Figure S2. XRD of UPy-Asp at pH=7.0 to pH=2.0.

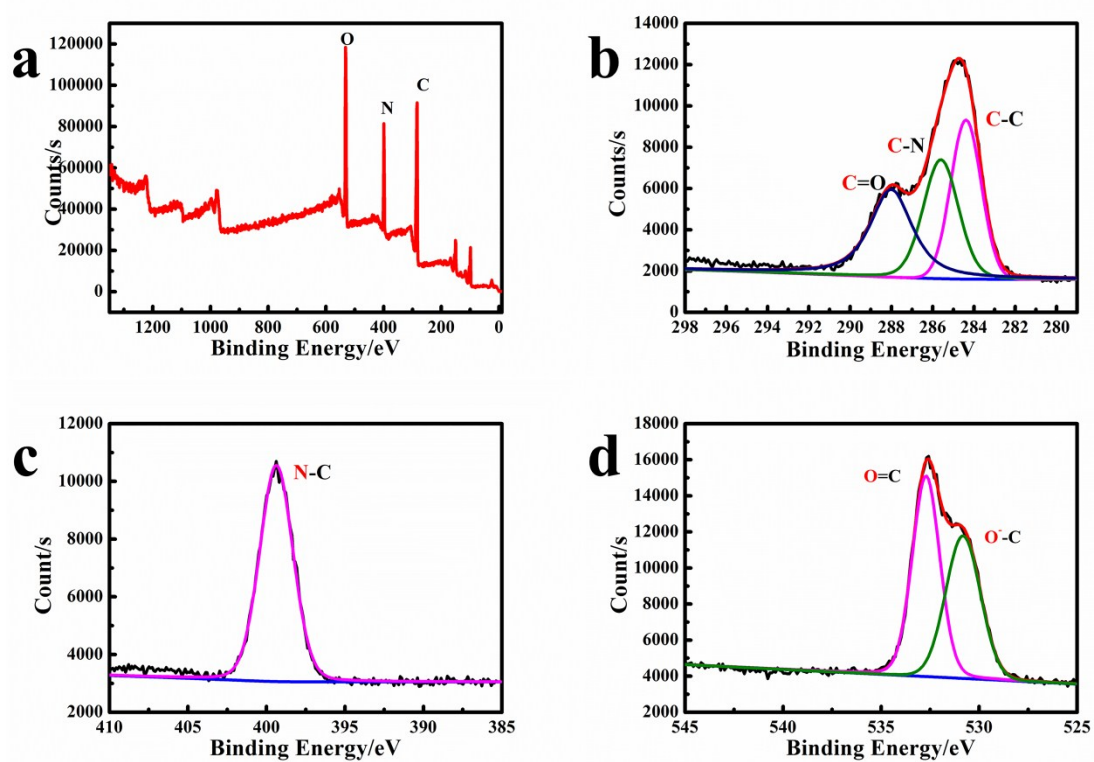

Figure S3. XPS of UPy-Asp at pH=7.0.

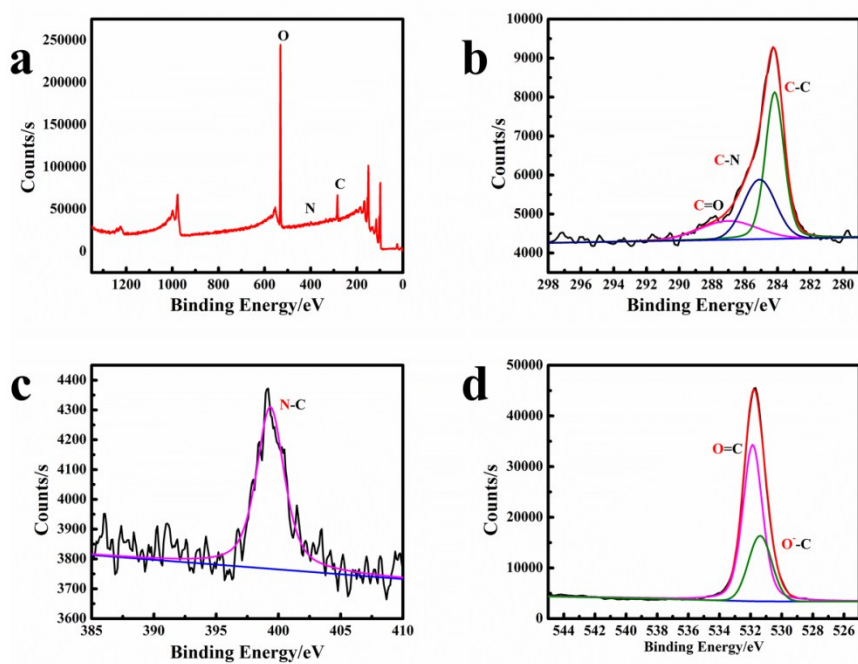

Figure S4. XPS of UPy-Asp at pH=2.0.

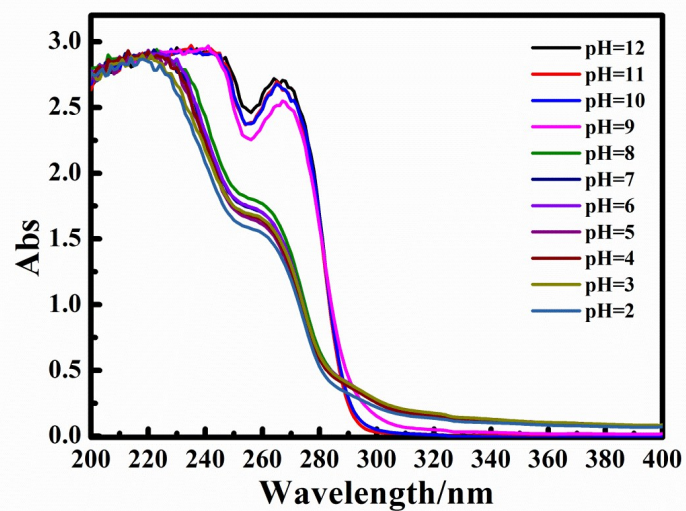

Figure S5. UV-vis of UPy-But at different pH.
